# Supplementary material for: Ionic liquid “buffers”—pH control in ionic liquid systems
Source: Royal Society of Chemistry journal article supplement (doi:10.1039/c0cc03089a), 2010-01-01

## Supplementary Information to accompany

# Ionic Liquid “Buffers” – pH control in Ionic Liquid Systems

Douglas R. MacFarlane,<sup>\*a</sup> R. Vijayaraghavan,<sup>a</sup> Huy N. Ha,<sup>a</sup> Aleksey Izgorodin,<sup>a</sup>  
Katherine D. Weaver,<sup>b</sup> and Gloria D. Elliott<sup>b</sup>

**Table S1.** Compositions of Ionic Liquid Buffer Systems Studied (apparent pH indicates the value that would be expected in a dilute aqueous environment)

| Buffer                                                   | Composition                                          | 'Apparent' pH |
|----------------------------------------------------------|------------------------------------------------------|---------------|
| Choline H <sub>2</sub> PO <sub>4</sub> /HPO <sub>4</sub> | Equimolar CDHP / CDP + H <sub>2</sub> O 20-50 %w/w   | ~ 7.2         |
| Choline Tar <sup>-</sup> /Tar <sup>2-</sup>              |                                                      | ~ 4.2         |
| LysH <sup>+</sup> /Lys                                   | 1 mol Lys / 0.5 mol HCl + H <sub>2</sub> O – 46% w/w | ~ 9.0         |

**Figure S1.** Effect of reducing water content of the CDHP/CHP buffer

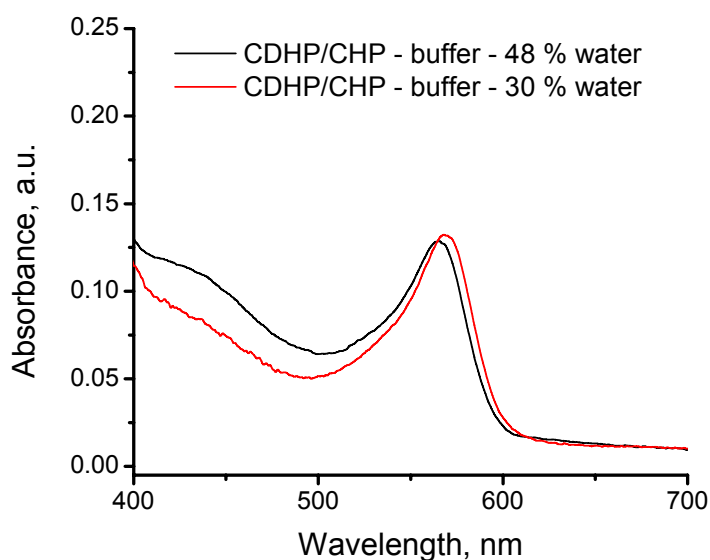

**Figure S2.** LysH<sup>+</sup>/Lys hydrated IL buffer containing thymol blue indicator challenged with additions of base. The dye is insensitive when excess base is added, whereby only a dilution effect can be observed.

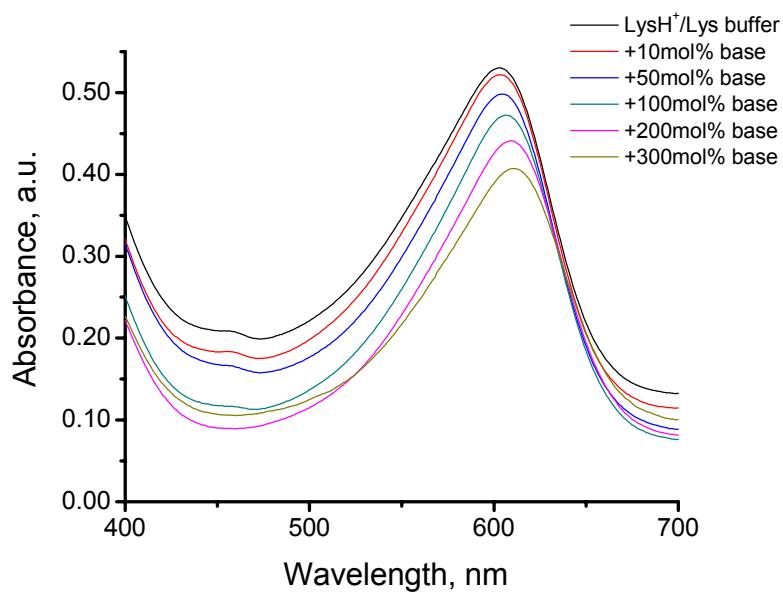

**Figure S3.** Choline tar<sup>-</sup>/tar<sup>2-</sup> hydrated IL buffer containing phenol red indicator.

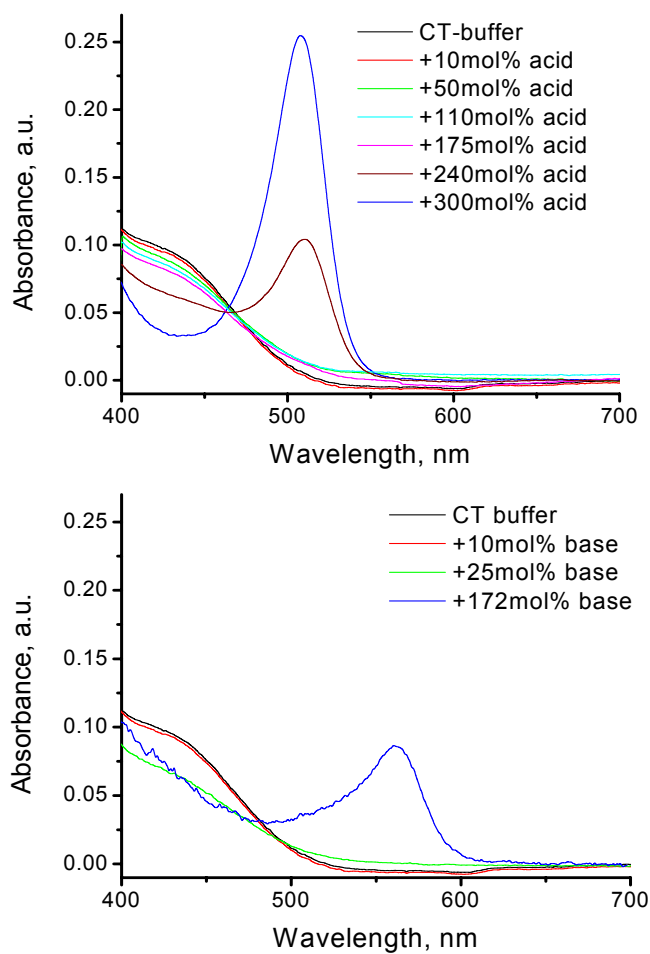

Supplement: c0cc03089a.pdf [file c0cc03089a.pdf]
